# Supplementary material for: Transcriptome Analysis Reveals the Molecular Regularity Mechanism Underlying Stem Bulblet Formation in Oriental Lily ‘Siberia’; Functional Characterization of the LoLOB18 Gene
Source: MDPI journal article supplement (doi:10.3390/ijms232315246), 2022-12-03
Supplement: s1 [file s1]

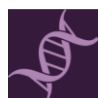

# Transcriptome Analysis Reveals the Molecular Regularity Mechanism Underlying Stem Bulblet Formation in Oriental Lily ‘Siberia’; Functional Characterization of the *LoLOB18* Gene

Shaozhong Fang <sup>1,†</sup>, Chenglong Yang <sup>1,†</sup>, Muhammad Moaaz Ali <sup>2</sup>, Mi Lin <sup>1</sup>, Shengnan Tian <sup>2</sup>, Lijuan Zhang <sup>2</sup>, Faxing Chen <sup>2</sup> and Zhimin Lin <sup>1,\*</sup>

**Table S1.** Summary of sample sequencing data quality.

| sample | raw_reads | clean_reads | clean_bases | error_rate | Q20   | Q30   | GC_pct |
|--------|-----------|-------------|-------------|------------|-------|-------|--------|
| AI_1   | 23940635  | 23023593    | 6.91G       | 0.03       | 97.05 | 92.49 | 45.76  |
| AI_2   | 26335661  | 24931990    | 7.48G       | 0.03       | 97.19 | 92.68 | 46.53  |
| AI_3   | 23631994  | 22749394    | 6.82G       | 0.03       | 97.79 | 93.81 | 49.74  |
| AII_1  | 23333055  | 22242572    | 6.67G       | 0.03       | 97.46 | 93.18 | 46.98  |
| AII_2  | 22998623  | 22007557    | 6.6G        | 0.03       | 97.6  | 93.43 | 47.13  |
| AII_3  | 22686930  | 21628791    | 6.49G       | 0.03       | 97.65 | 93.47 | 49.03  |
| AIII_1 | 23382409  | 22517722    | 6.76G       | 0.03       | 97.55 | 93.25 | 47.63  |
| AIII_2 | 23922151  | 22604843    | 6.78G       | 0.03       | 97.6  | 93.26 | 49.09  |
| AIII_3 | 23025309  | 21890514    | 6.57G       | 0.03       | 97.52 | 93.21 | 48.23  |
| BI_1   | 22760794  | 22291418    | 6.69G       | 0.02       | 98.55 | 95.48 | 47.45  |
| BI_2   | 25263161  | 24507882    | 7.35G       | 0.03       | 97.6  | 93.36 | 49.84  |
| BI_3   | 23510572  | 22740522    | 6.82G       | 0.03       | 97.63 | 93.42 | 50.67  |
| BII_1  | 23099381  | 22342918    | 6.7G        | 0.03       | 97.73 | 93.61 | 50.29  |
| BII_2  | 23503526  | 22691422    | 6.81G       | 0.03       | 97.63 | 93.41 | 50.27  |
| BII_3  | 23393160  | 22605723    | 6.78G       | 0.03       | 97.75 | 93.65 | 50.1   |
| BIII_1 | 23694202  | 22980909    | 6.89G       | 0.03       | 97.71 | 93.51 | 49.54  |
| BIII_2 | 23625022  | 22302139    | 6.88G       | 0.03       | 97.89 | 93.76 | 49.58  |
| BIII_3 | 23767045  | 23075120    | 6.92G       | 0.03       | 97.7  | 93.51 | 49.85  |

AI – vertical (control) group after 20 days of planting; AII – horizontal group after 20 days of planting; AIII – slant group after 20 days of planting; BI – vertical (control) group after 50 days of planting; BII – horizontal group after 50 days of planting; BIII – slant group after 50 days of planting.

**Table S2.** The primer pairs used in study.

| Gene                | Primer sequence (5'–3')                        | Temperature (°C) | Amplification Size |
|---------------------|------------------------------------------------|------------------|--------------------|
| <i>LoLOB18</i>      | F:ATGAGCTGCAGTACGAGCAGCG                       | 56               | 687 bp             |
|                     | R:TCACCTAGAGACTGGAGGAGTAT                      |                  |                    |
| <i>TRV-LOB18</i>    | F:TGAGTAAGGTTACCGGAATTCATCTGCTACGAGG CACAGG    | 58               | 340 bp             |
|                     | R:GGGACATGCCCCGGGCTCGAGGTTGTTGTTGCTGCTGG AGGTT |                  |                    |
| <i>qPCR-LOB18</i>   | F:TTCCAACCTCCACCCTCCTTGTC                      | 57.5             | 180 bp             |
|                     | R:CTCCACCACCCTGCTGCTA                          |                  |                    |
| <i>coat protein</i> | F:CCTGCTGACTTGATGGACGA                         | 55.5             | 359 bp             |
|                     | R:CCAGTGTTGCGCTTGGTAGT                         |                  |                    |
| <i>qPCR-SUS</i>     | F:TATTCTGAGAGGCTGATGACACT                      | 55.2             | 122bp              |
|                     | R:CAAGTTACGGTATTTGAGGGCATA                     |                  |                    |
| <i>qPCR-SUAR</i>    | F:TCTCATCTCACACCTTGCCAT                        | 55               | 144bp              |
|                     | R:CCTCCTGCTCATCATACTTCCT                       |                  |                    |
| <i>qPCR-GID</i>     | F:GAGAAATGAAACGGCAATCG                         | 55.8             | 109                |
|                     | R:CTCAAATACCAGGTCCTCCC                         |                  |                    |
| <i>qPCR-SLR1</i>    | F:GTGGTTGAACAAGAAGCAAATC                       | 55.5             | 84bp               |
|                     | R:CGAACATAGTAGAGTAGTAGTGG                      |                  |                    |
| <i>qPCR-XTH23</i>   | F:GACTTCCACACTTACTCCATCGT                      | 56.2             | 256bp              |
|                     | R:CCATACCAGACACAGGCATCAG                       |                  |                    |
| <i>qPCR-AGPS</i>    | F:GCTTCTTGCGTGAATGTGGTAT                       | 56               | 274bp              |
|                     | R:ATCTTCTGGTCTATCGGCTTCTT                      |                  |                    |
| <i>qPCR-GH3.8</i>   | F:GCTGATGGAGTACGCTATT                          | 56.4             | 195bp              |
|                     | R:ATGCTCTAAGTGGAGAATGG                         |                  |                    |
| <i>qPCR-EF</i>      | F:GGCACTAACTCGCTCCTTCTG                        | 56               | 173bp              |
|                     | R:TTGGTAAGATGCTGGTGATTGGAT                     |                  |                    |
| <i>qPCR-KNOX1</i>   | F:CTTCACCTCACACCTTCTACCA                       | 55.4             | 146bp              |
|                     | R:GCCTTGACGGACTCCACAT                          |                  |                    |

**Table S3.** Annotation of assembled unigenes against seven public databases.

| Database               | Number of Unigenes | Percentage |
|------------------------|--------------------|------------|
| Annotated in NR        | 63762              | 43.81      |
| Annotated in NT        | 53444              | 36.72      |
| Annotated in KO        | 27326              | 18.77      |
| Annotated in SwissProt | 56595              | 38.88      |
| Annotated in PFAM      | 54137              | 37.19      |
| Annotated in GO        | 54133              | 37.19      |

|                                    |        |       |
|------------------------------------|--------|-------|
| Annotated in KOG                   | 24441  | 16.79 |
| Annotated in all Databases         | 13913  | 9.56  |
| Annotated in at least one Database | 145530 | 100   |
| Total Unigenes                     | 145530 | 100   |

**Table S4.** The sequences of *LoLOB18*.

ATGAGCTGCAGTACGAGCAGCGGAGCTGGCGGTGGCGCCGCCGGTGGCGGCAGTGGTAGCGGAGGCGGC  
 GGTCCGTGCGGGGCATGCAAGTTCCTGAGGAGGAAGTGCGTGAGCGGGTGCATTTTTGCTCCTTACTTCGA  
 CTCCGAGCAGGGAGCGGCGCATTTGCGCGCCGTGCACAAGGTGTTTGGTGCGAGCAATGTGTCTGAAGCTG  
 CTGCTGCATATTCCGGCACACAAGAGGCTGGATGCGGTCATCACTATCTGCTACGAGGCACAGGCGAGGC  
 TGCGGGATCCTGTCTATGGATGTGTTGCTCATATATTTGCGCTGCAGCAGCAGGTGGTGAACCTACAGGCC  
 GAGCTCTCCTACTTACAAGCCACCTGGCAACCCTAGAGCTACCATCTCCTCCTCCGCCGCCGCCGCCGAAT  
 TCCAACCTCCACCCTCCTTGTCCATGTCTGACCTGCCCTCTGCCTCGAACATAACCCACCTACCTGGACCTCTC  
 CAGCCTCTTTGATCCCCCTCAGCAGCCCCCGTGGAACCTCCAGCAGCAACAACAACAGGTTCAACTCCGAC  
 AGACGCTTGGGTCCGGTAGCAGCAGTGGTGGTGGAGACCTCCATGCACTGGCGAGGGAACCTCCTGGGTCTG  
 CCACCGATGCCCCGCCAGGCGATACACTGGATACTCCTCCAGTCTCTAGGTGA

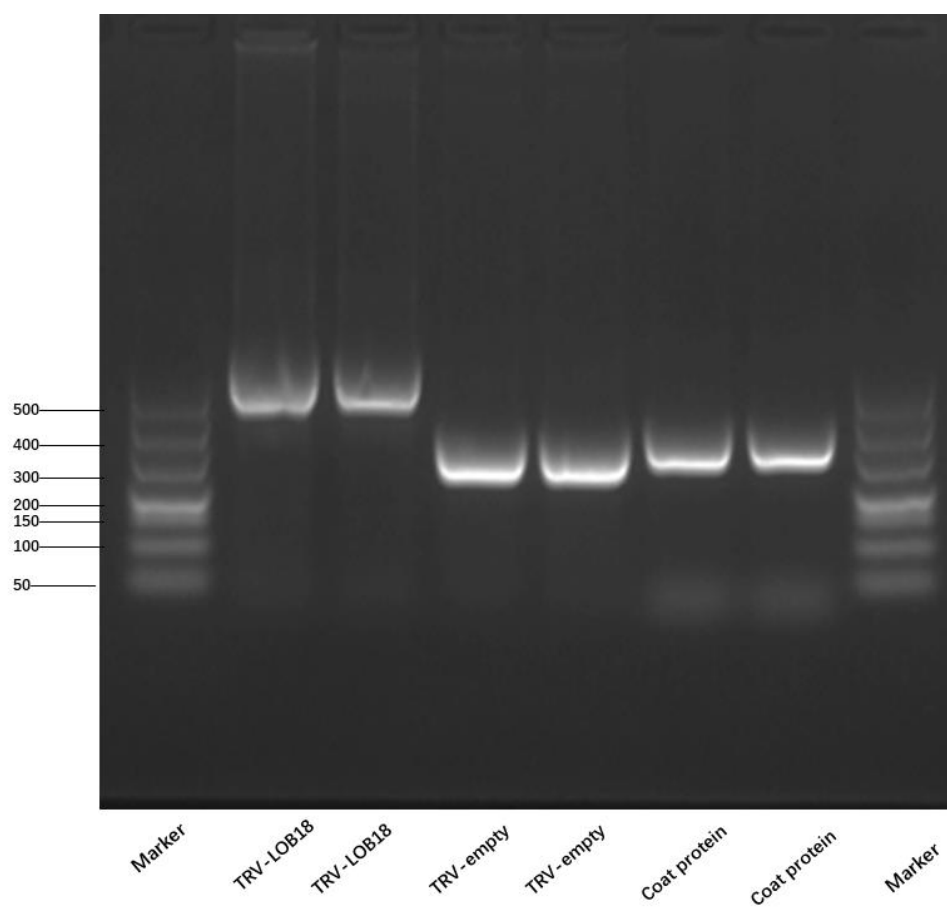

**Figure S1.** The figure showing successful insertion and expression of TRV2 and TRV2-LOB18 in the genome of lilium.

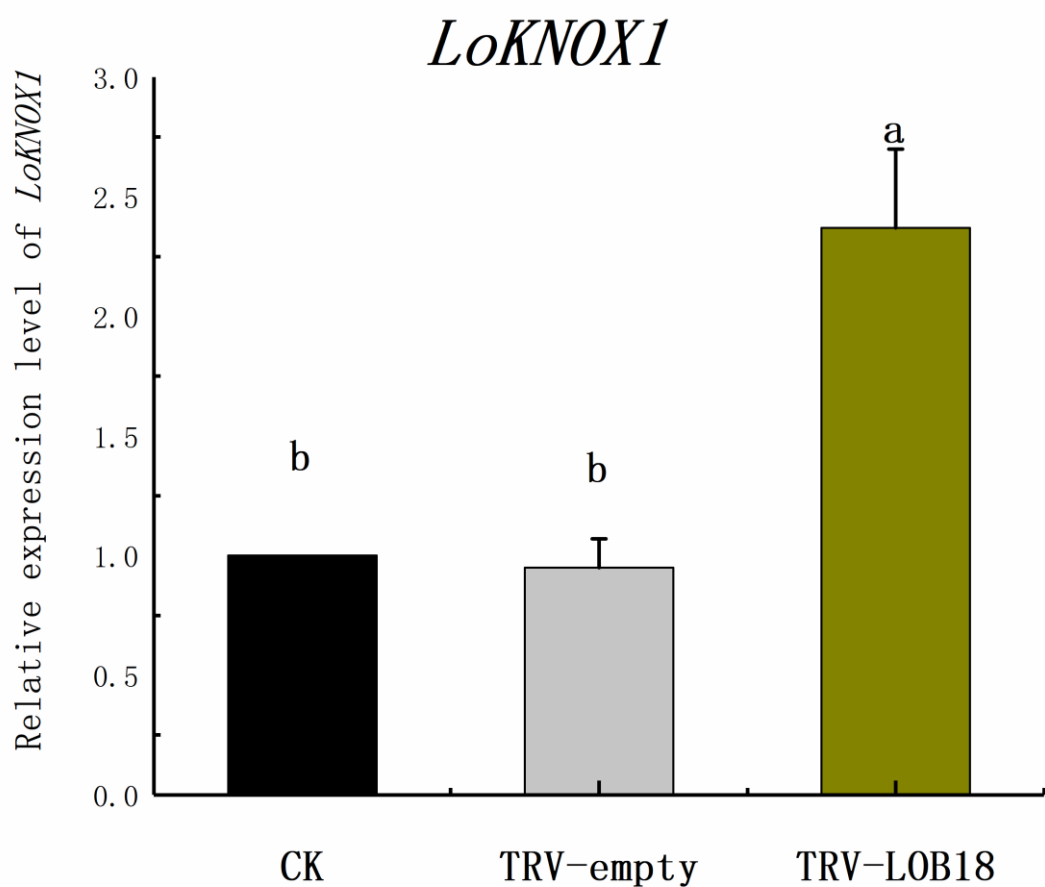

**Figure S2.** Relative expression of *LoKNOX1* after successful insertion of TRV2 and TRV2-LOB18. Lowercase letters indicate significance among treatment groups according to Duncan's multiple range test at  $p < 0.05$ .

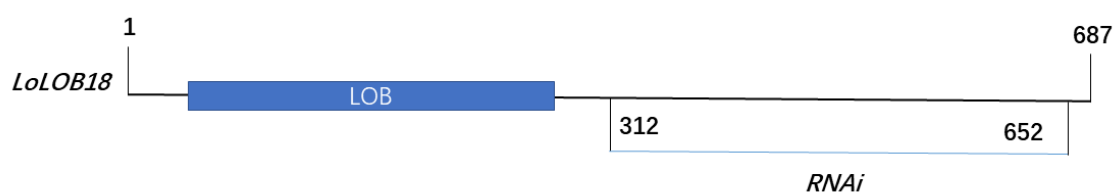

**Figure S3.** A model showing restriction sites during VIGS experiment.
